# Supplementary material for: Ni(ii) tetraphosphine complexes as catalysts/initiators in the ring opening polymerization of ε-caprolactone
Source: Royal Society of Chemistry journal article supplement (doi:10.1039/c3dt52412d), 2013-10-11
Supplement: c3dt52412d.pdf [file c3dt52412d.pdf]

## Electronic Supplementary Information

### Ni(II) tetrphosphine complexes as catalysts/initiators in the ring opening polymerization of $\epsilon$ -caprolactone

Xin-Yi Wu,<sup>a</sup> Zhi-Gang Ren,<sup>\*a</sup> and Jian-Ping Lang<sup>\*,a,b</sup>

<sup>a</sup> College of Chemistry, Chemical Engineering and Materials Science, Soochow University, Suzhou 215123, People's Republic of China. Fax: +86 512 65882865; Tel: +86 512 65882865; E-mail: [jplang@suda.edu.cn](mailto:jplang@suda.edu.cn)

<sup>b</sup> State Key Laboratory of Organometallic Chemistry, Shanghai Institute of Organic Chemistry, Chinese Academy of Sciences, Shanghai 200032, People's Republic of China

## Contents

|                                                                                                         |    |
|---------------------------------------------------------------------------------------------------------|----|
| <b>Figure S1.</b> The $^1\text{H}$ NMR spectrum of <b>1</b> in $d_6$ -DMSO.....                         | S3 |
| <b>Figure S2.</b> The $^{31}\text{P}$ NMR spectrum of <b>1</b> in $d_6$ -DMSO.....                      | S3 |
| <b>Figure S3.</b> The $^{13}\text{C}$ NMR spectrum of <b>1</b> in $d_6$ -DMSO.....                      | S4 |
| <b>Figure S4.</b> The $^1\text{H}$ NMR spectrum of <b>2</b> in $d_6$ -DMSO.....                         | S4 |
| <b>Figure S5.</b> The $^{31}\text{P}$ NMR spectrum of <b>2</b> in $d_6$ -DMSO.....                      | S5 |
| <b>Figure S6.</b> The $^{13}\text{C}$ NMR spectrum of <b>2</b> in $d_6$ -DMSO.....                      | S5 |
| <b>Figure S7.</b> (a) ESI-MS spectrum of <b>1</b> in MeCN. (b) ESI-MS spectrum of <b>2</b> in MeCN..... | S6 |
| <b>Figure S8.</b> The TGA curves for <b>1</b> and <b>2</b> .....                                        | S7 |
| <b>Figure S9.</b> The $^1\text{H}$ NMR spectrum of PCL in $\text{CDCl}_3$ .....                         | S7 |
| <b>Figure S10.</b> The $^{13}\text{C}$ NMR spectrum of PCL in $\text{CDCl}_3$ .....                     | S8 |
| <b>Figure S11.</b> The $^{31}\text{P}$ NMR spectrum of PCL in $\text{CDCl}_3$ .....                     | S8 |
| <b>Scheme S1.</b> The proposed mechanism for the ROP of $\epsilon$ -caprolactone.....                   | S9 |

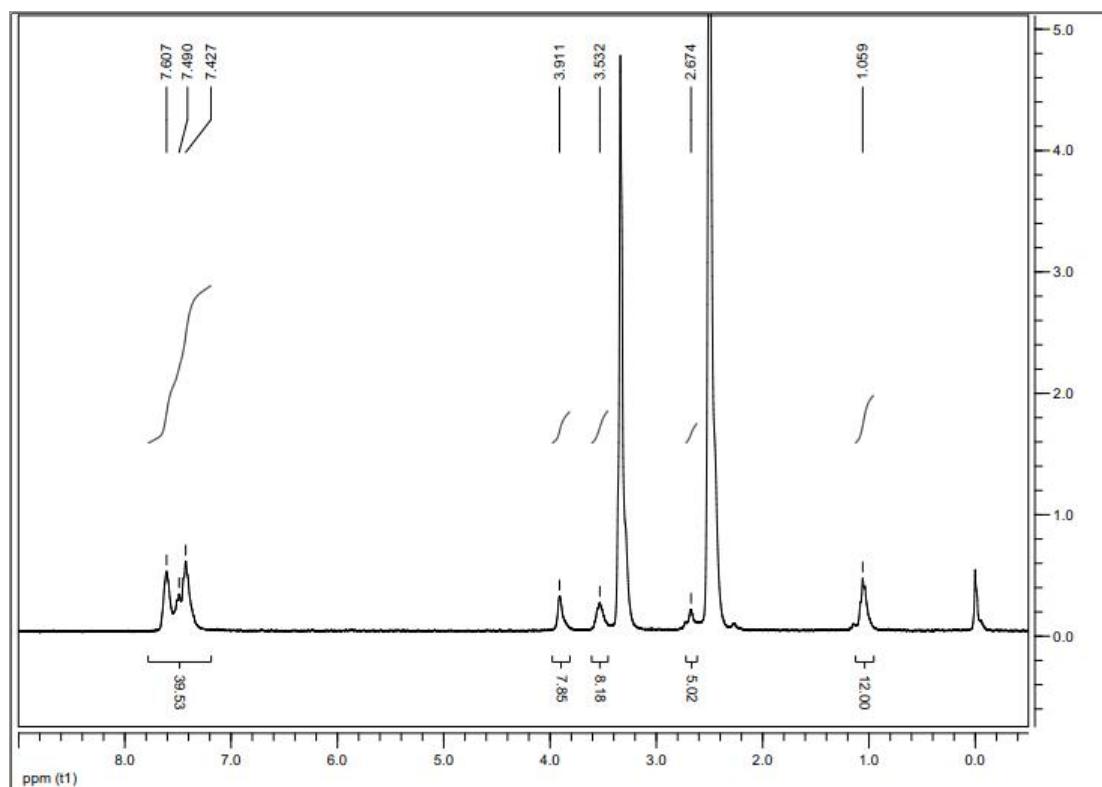

**Figure S1.** The  $^1\text{H}$  NMR spectrum of **1** in  $d_6$ -DMSO.

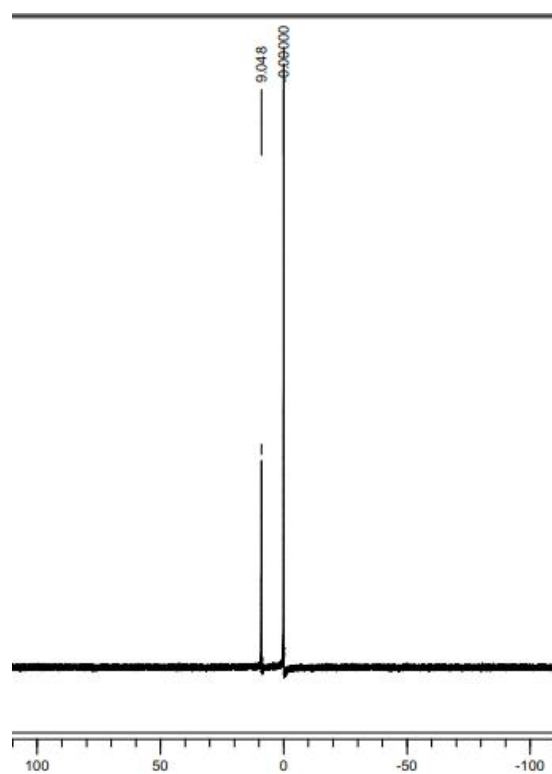

**Figure S2.** The  $^{31}\text{P}$  NMR spectrum of **1** in  $d_6$ -DMSO.

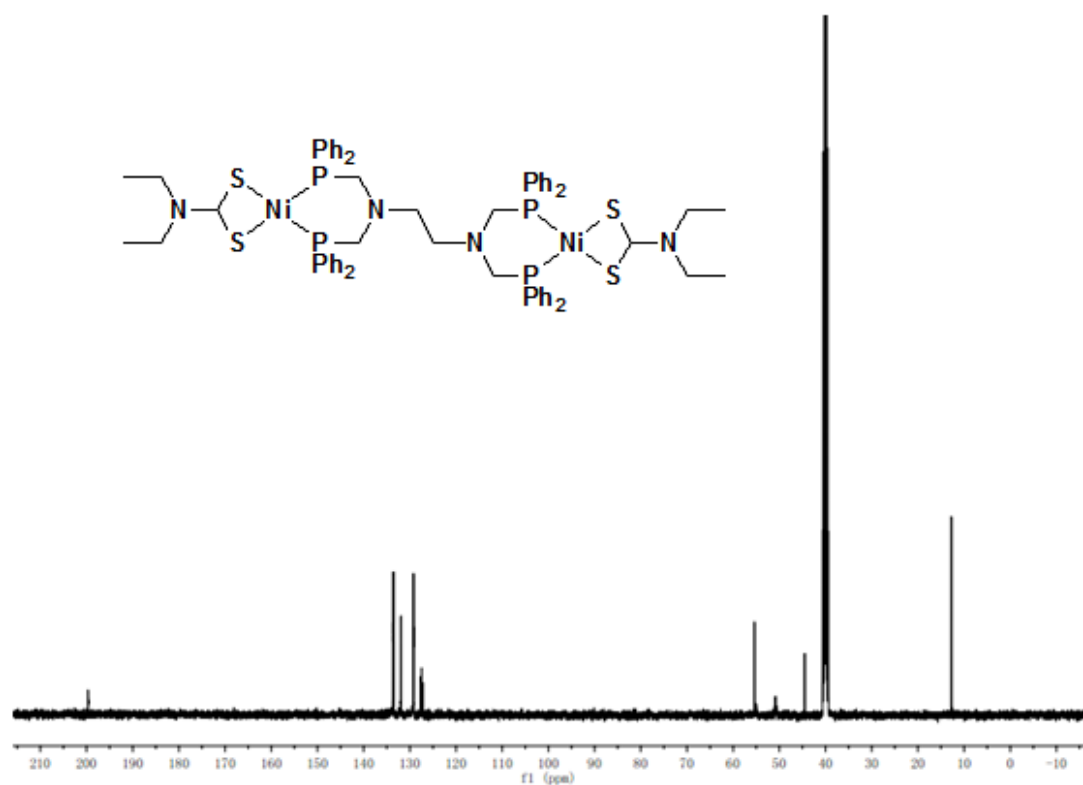

**Figure S3.** The <sup>13</sup>C NMR spectrum of **1** in *d*<sub>6</sub>-DMSO.

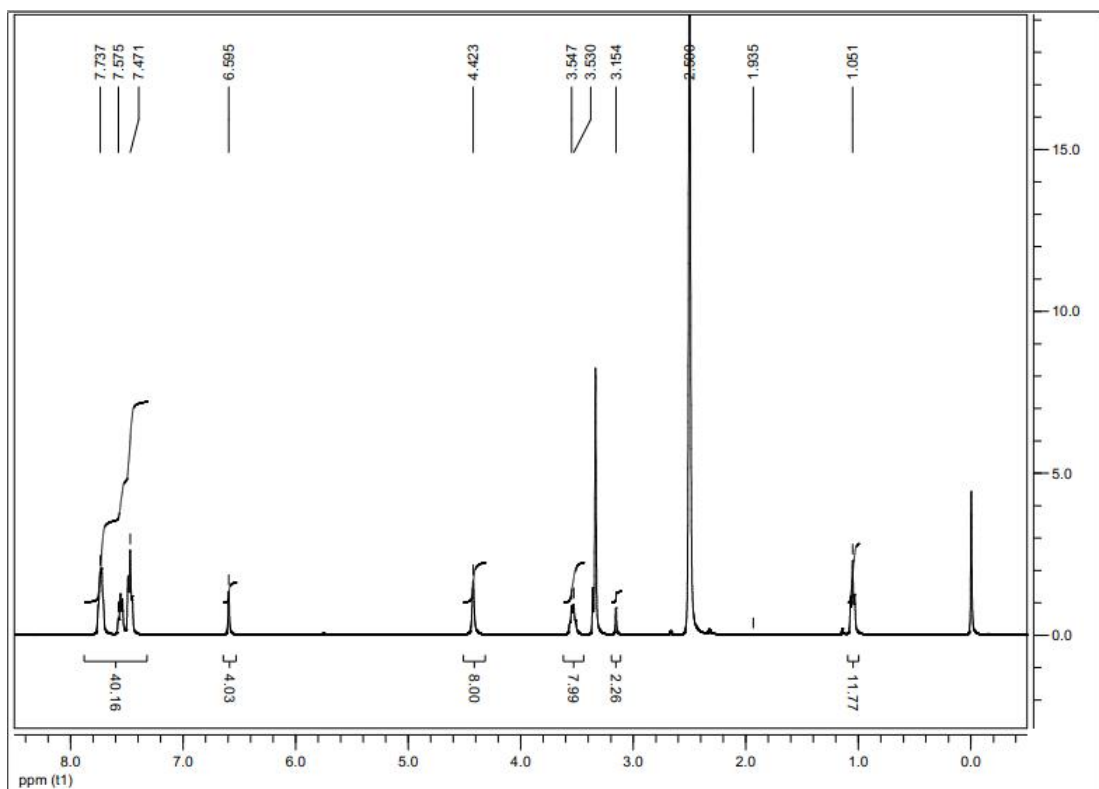

**Figure S4.** The <sup>1</sup>H NMR spectrum of **2** in *d*<sub>6</sub>-DMSO.

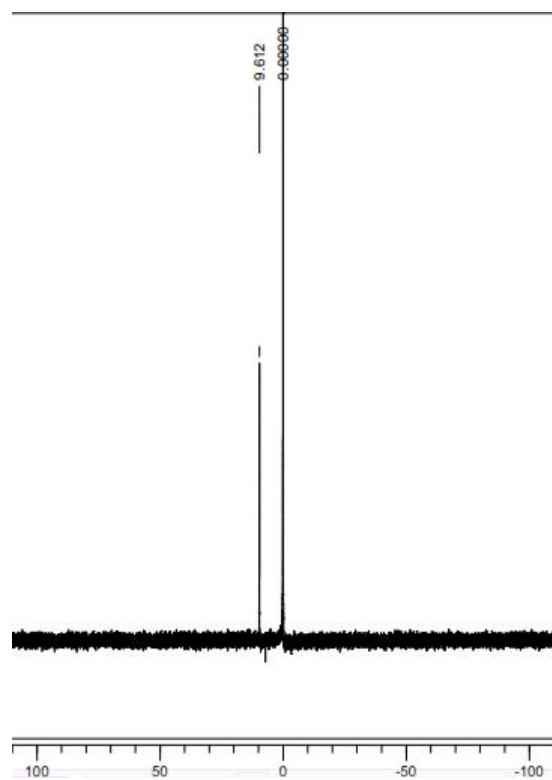

**Figure S5.** The  $^{31}\text{P}$  NMR spectrum of **2** in  $d_6$ -DMSO.

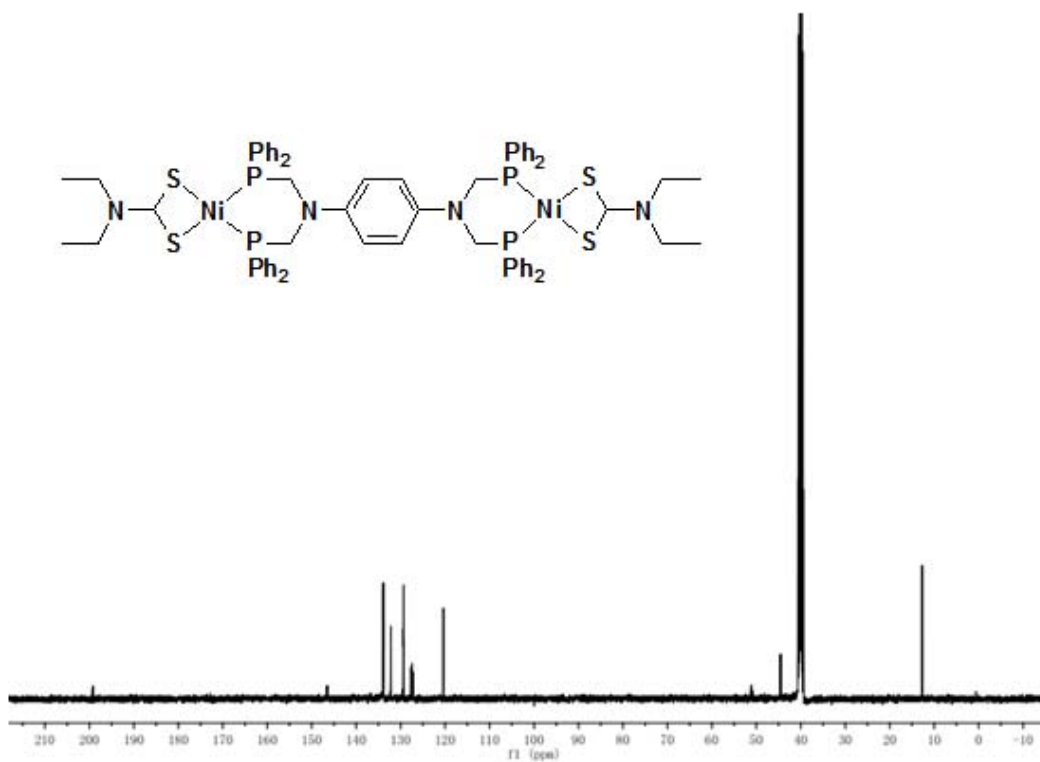

**Figure S6.** The  $^{13}\text{C}$  NMR spectrum of **2** in  $d_6$ -DMSO

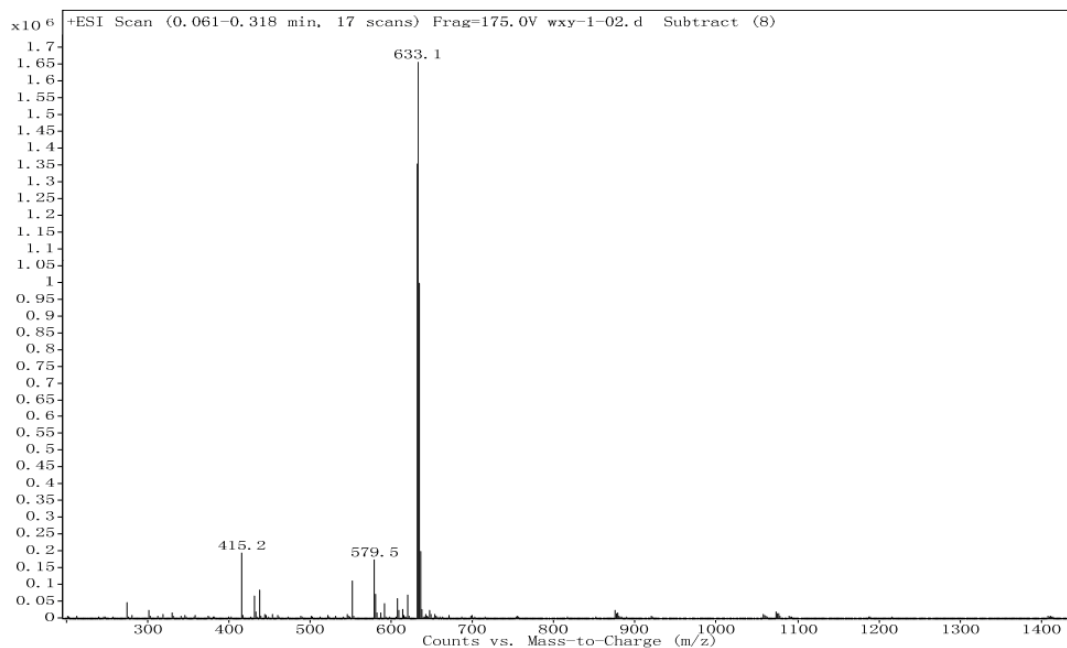

(a)

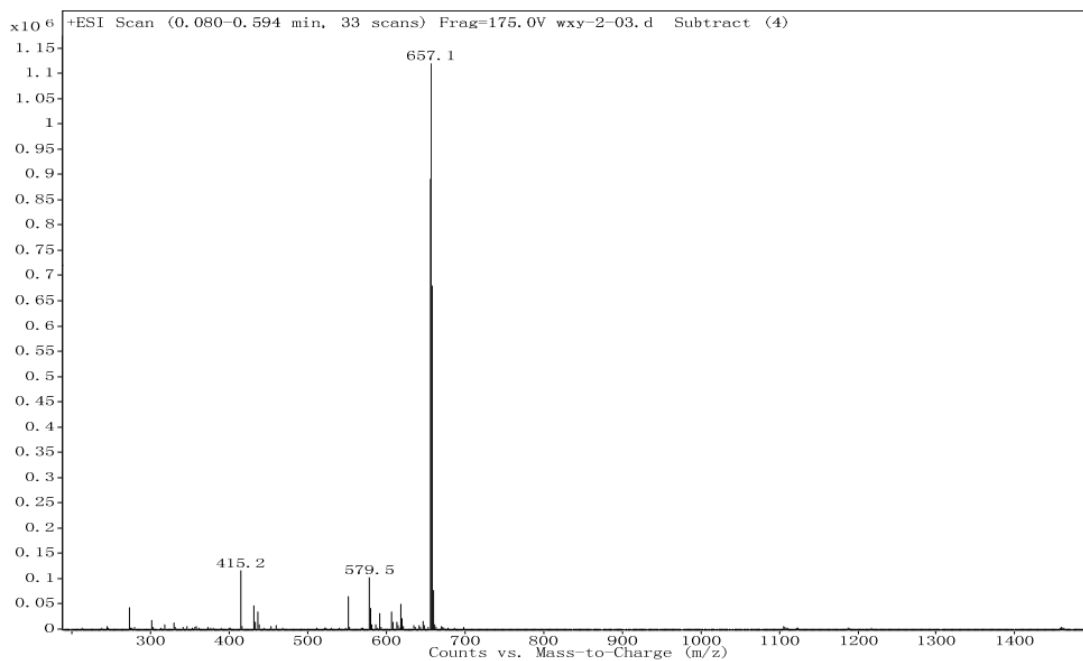

(b)

**Figure S7.** (a) ESI-MS spectrum of **1** in CH<sub>3</sub>CN; (b) ESI-MS spectrum of **2** in CH<sub>3</sub>CN

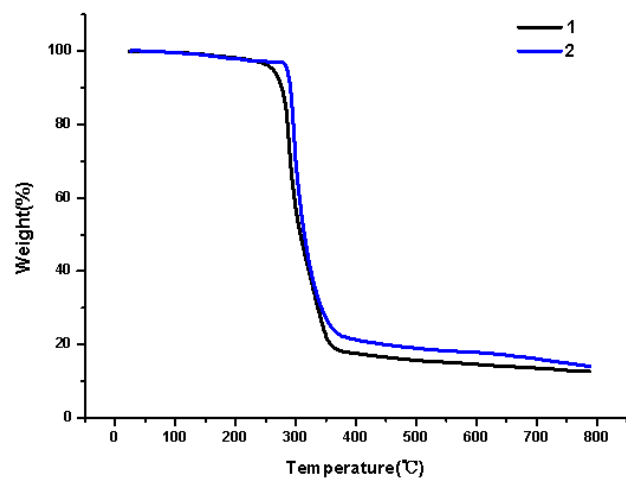

Figure S8. The TGA curves for compounds 1 and 2.

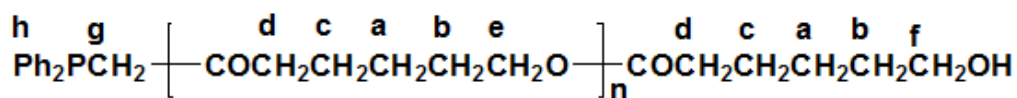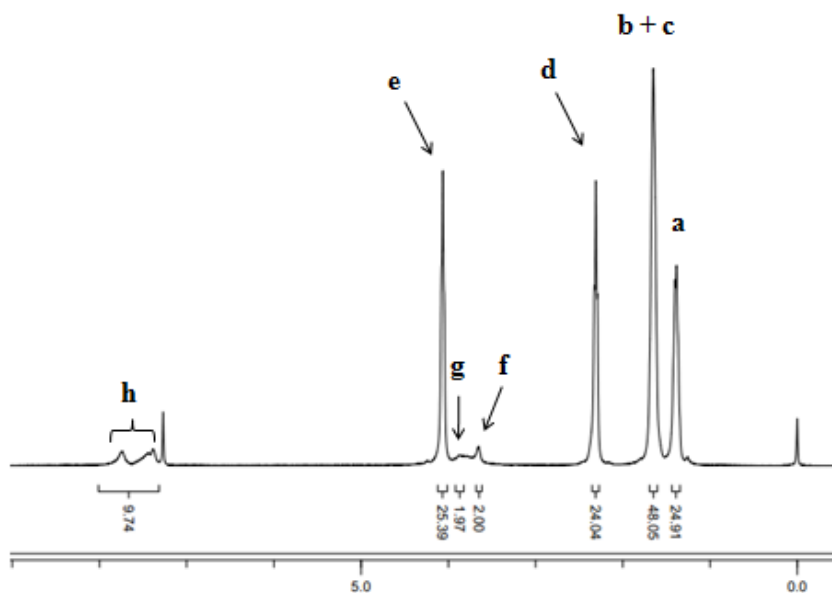

Figure S9. The <sup>1</sup>H NMR spectrum of PCL in CDCl<sub>3</sub>.

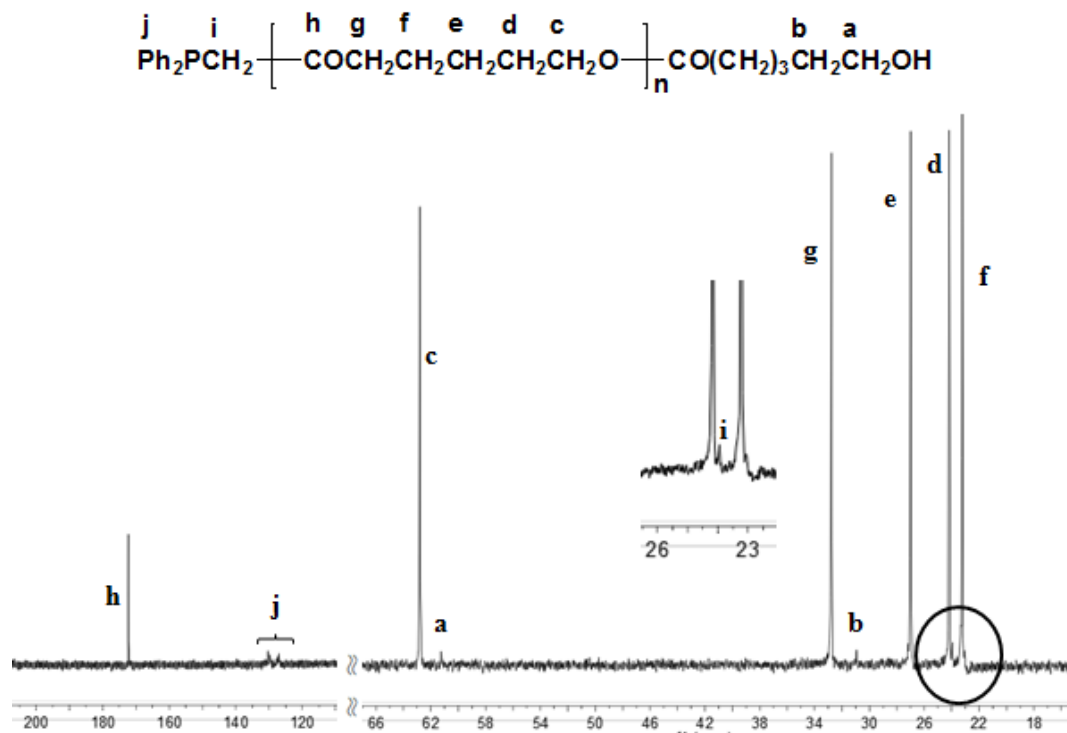

**Figure S10.** The  $^{13}\text{C}$  NMR spectrum of PCL in  $\text{CDCl}_3$ .

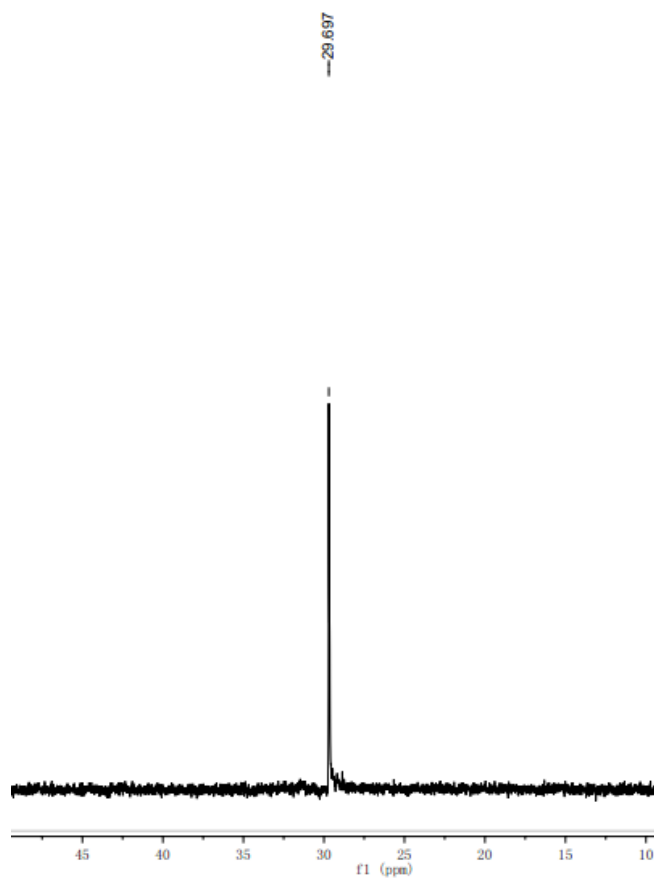

**Figure S11.** The  $^{31}\text{P}$  NMR spectrum of PCL in  $\text{CDCl}_3$ .



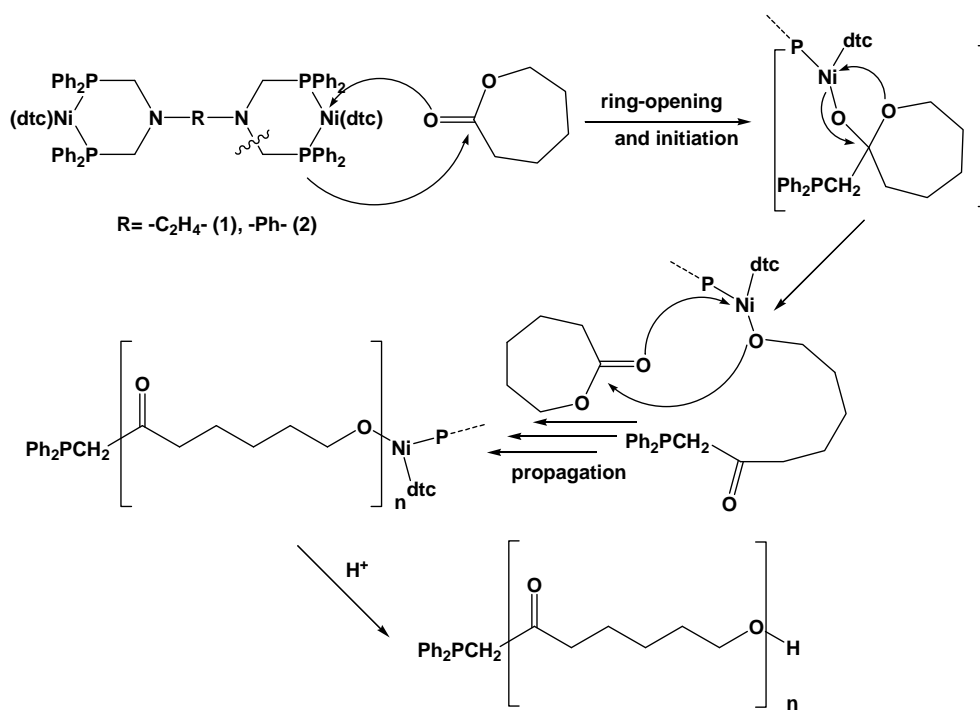

**Scheme S1.** The proposed mechanism for the ROP of  $\epsilon$ -caprolactone.
